# Supplementary material
Source: PubMed Central journal article supplement (PMC3072820)

A

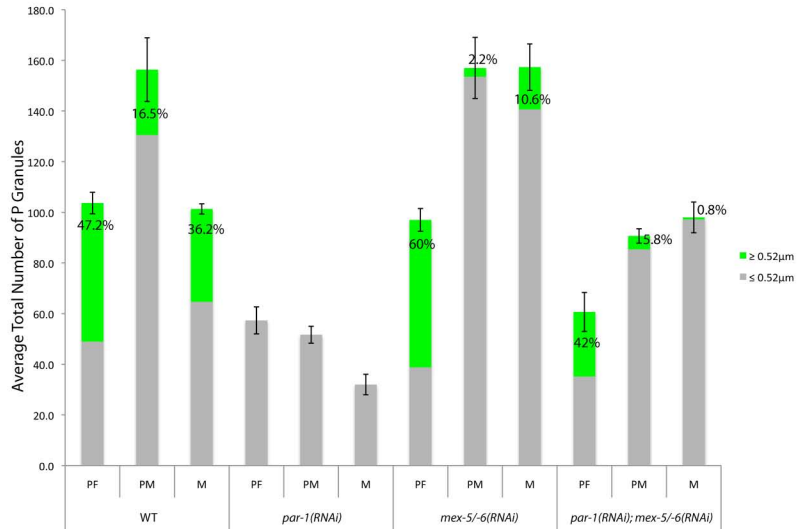

B

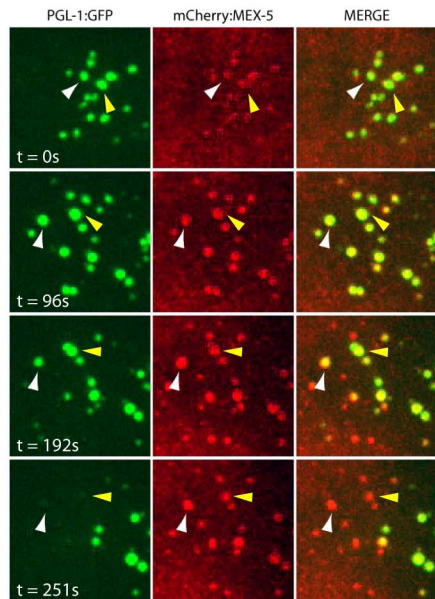

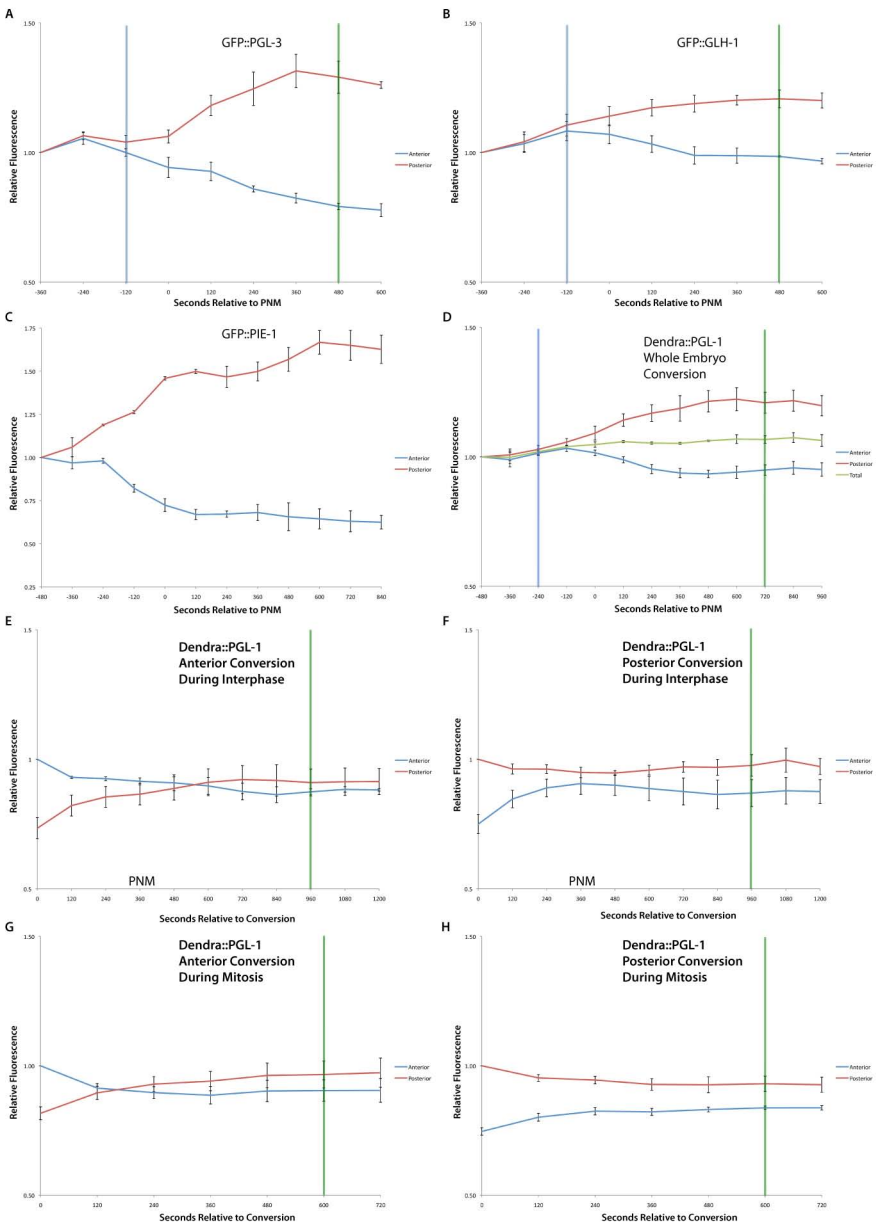

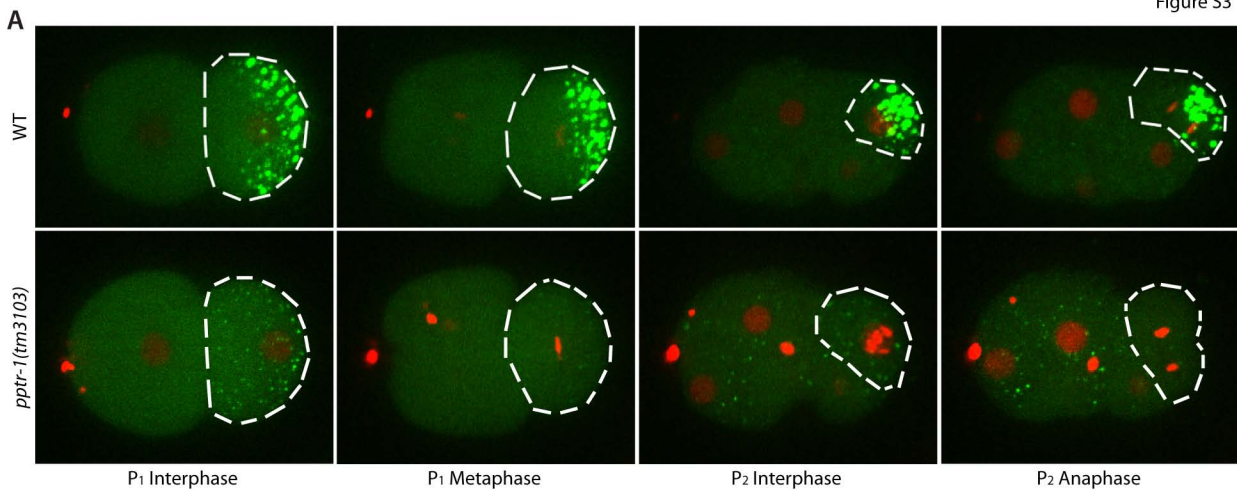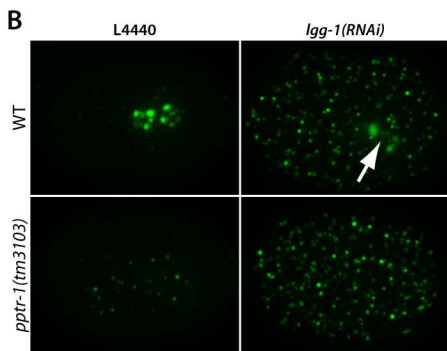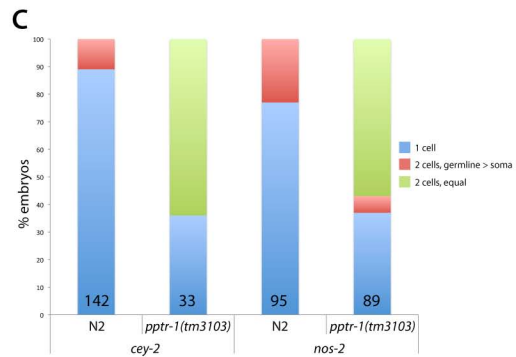

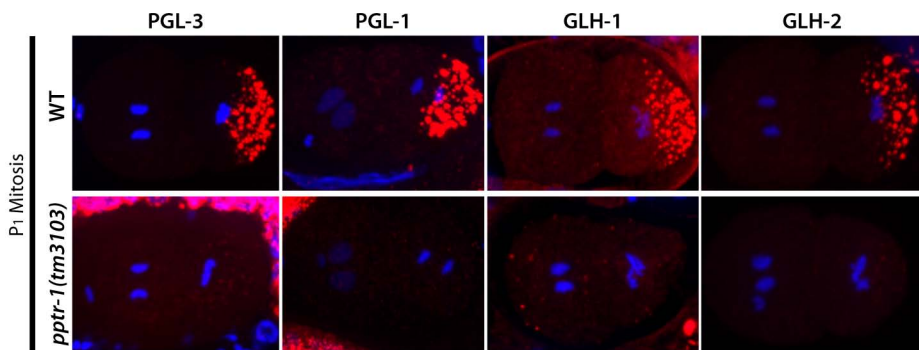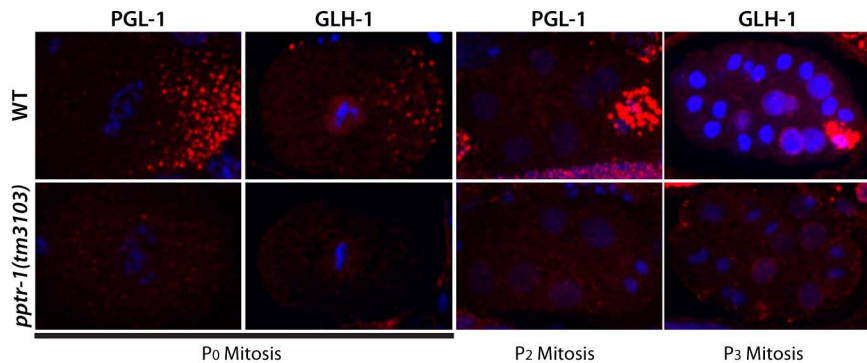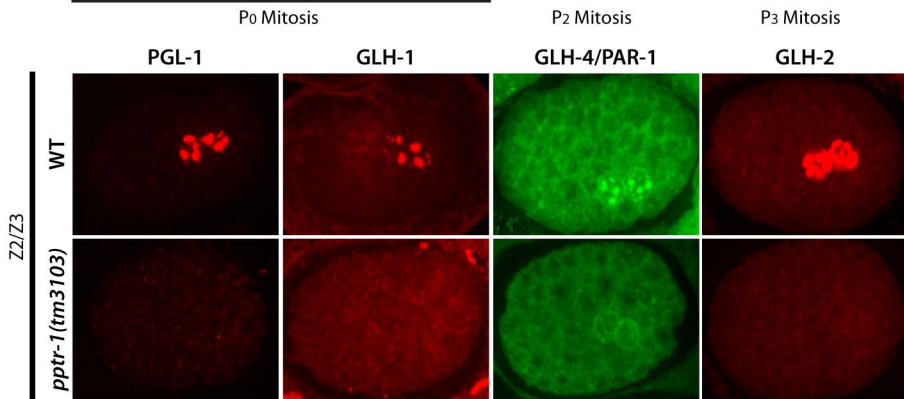

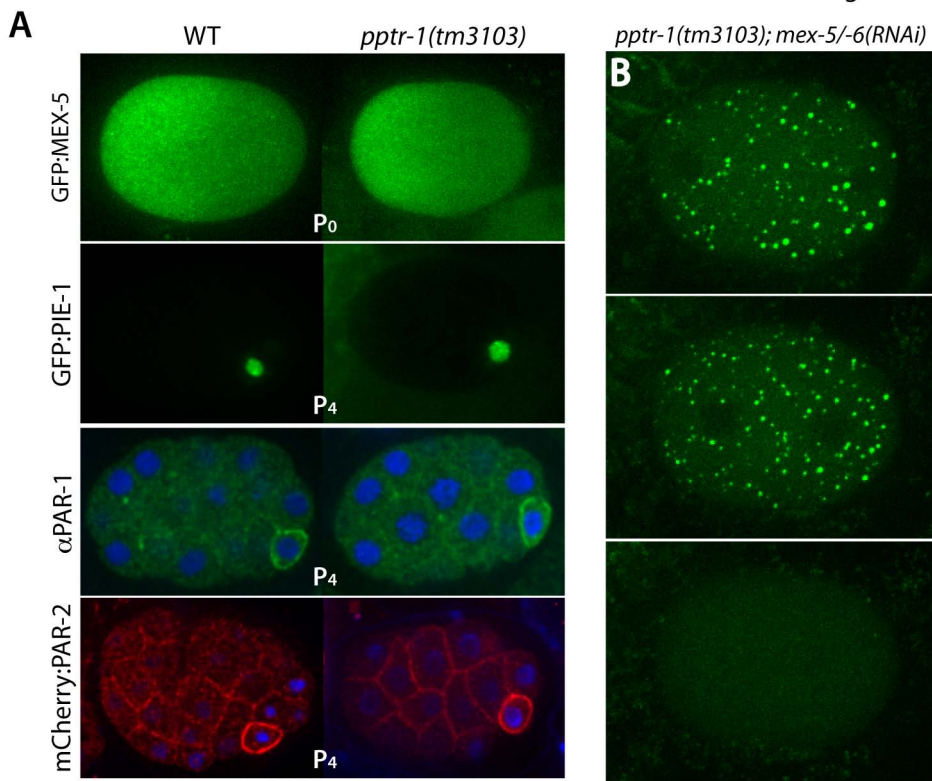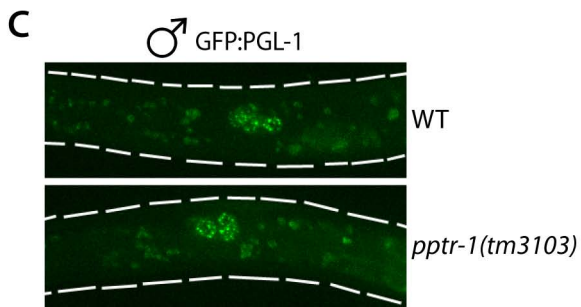

## Control Cross:

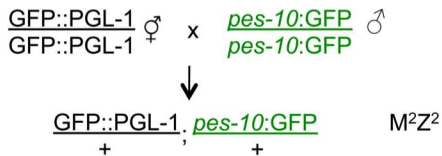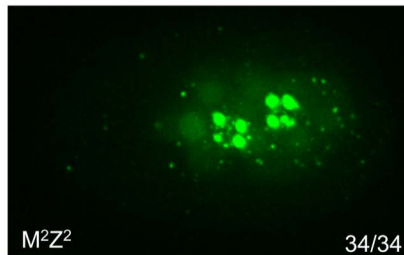*pptr-1* cross: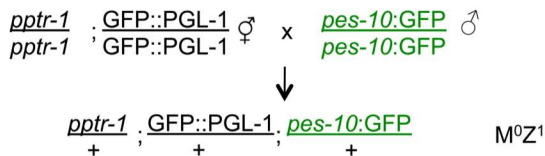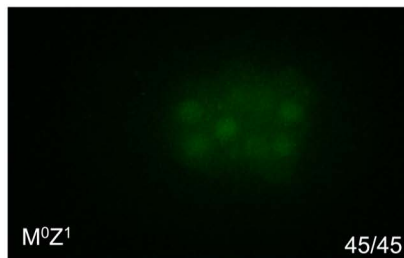

↓ Self

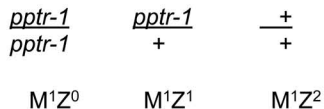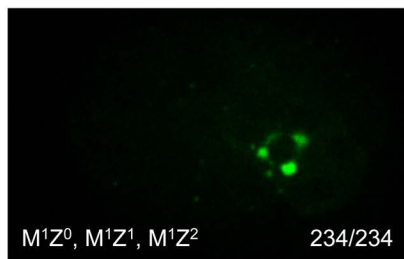

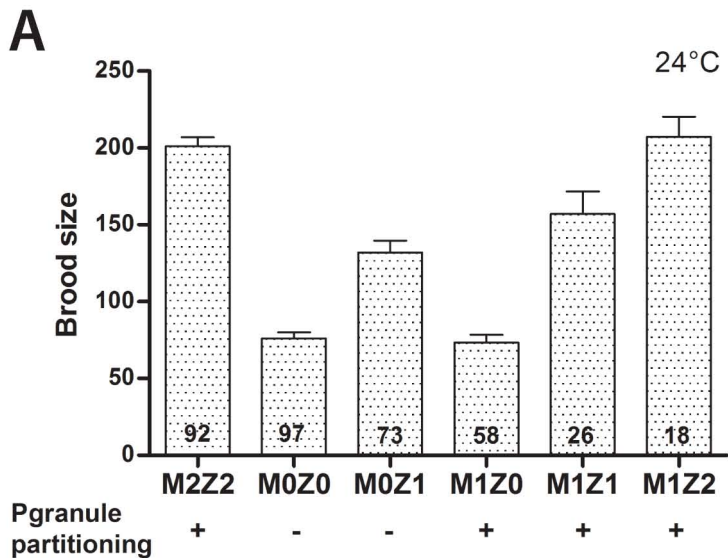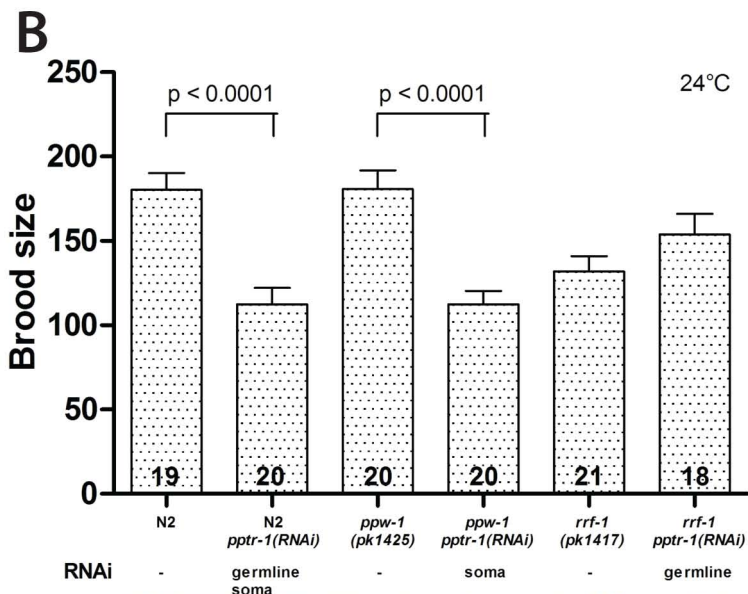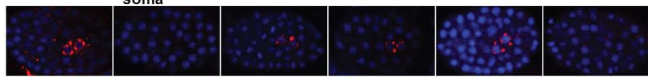

Supplement: NIHMS280398-supplement-2.pdf [file NIHMS280398-supplement-2.pdf]
